# Supplementary material for: The Zintl ion [As7]2−: an example of an electron-deficient Asx radical anion
Source: Royal Society of Chemistry journal article supplement (doi:10.1039/c0cc03219k), 2011-01-01
Supplement: c0cc03219k.pdf [file c0cc03219k.pdf]

# Electronic Supplementary Information

## The Zintl Ion $[\text{As}_7]^{2-}$ : An Example of an Electron-Deficient $\text{As}_x$ Radical Anion

Sukhendu Mandal<sup>a</sup>, Ran Liu<sup>a</sup>, Arthur C. Reber<sup>b</sup>, Meichun Qian<sup>b</sup>, Héctor M. Saavedra<sup>a</sup>, Xianglin Ke<sup>c</sup>, Peter Schiffer<sup>c</sup>, Saikat Sen<sup>d</sup>, Paul S. Weiss<sup>\*a,c,e</sup>, Shiv N. Khanna<sup>\*b</sup> and Ayusman Sen<sup>\*a</sup>

<sup>a</sup>*Department of Chemistry, The Pennsylvania State University, University Park, PA 16802, USA*  
Fax: 814-863-5319, E-mail: [asen@psu.edu](mailto:asen@psu.edu)

<sup>b</sup>*Department of Physics, Virginia Commonwealth University, Richmond, VA 23284, USA*  
Fax: 804-828-7073, E-mail: [snkhanna@vcu.edu](mailto:snkhanna@vcu.edu)

<sup>c</sup>*Department of Physics, The Pennsylvania State University, University Park, PA 16802, USA*

<sup>d</sup>*Department of Organic Chemistry, Indian Institute of Science, Bangalore, 560012, India.*

<sup>e</sup>*Current address: California NanoSystems Institute, Department of Chemistry & Biochemistry, University of California, Los Angeles, CA 90095, USA, Fax: 310-267-4918, E-mail: [psw@cnsi.ucla.edu](mailto:psw@cnsi.ucla.edu)*

## Experimental Section

**General Methods.** All of the reagents used were commercially available and used without further purification. 4,7,13,16,21,24-hexaoxa-1,10-diazabicyclo[8.8.8]hexacosane (2,2,2-crypt), anhydrous ethylenediamine (en) (99.5%, purified by redistillation, packed under Ar), lithium perchlorate and lithium tetrafluoroborate were purchased from Aldrich. Potassium (99.95%, ampouled under Argon), was purchased from Alfa Aesar. Tetrahydrofuran (THF) was dried by passing through an activated alumina column followed by deoxygenation by passing over a copper catalyst. All glassware (oven dried), reactants, and solvents were stored in a glove box filled with argon.

All manipulations were performed in an argon-filled glove box. The detailed synthetic procedures of the precursors  $K_3As_7$  is summarized below:

**Precursor  $K_3As_7$ :** The precursors,  $K_3As_7$  were synthesized by mixing of As (~700 mg) with a preheated mixture of K (~120 mg) and en (3 ml) in a scintillation vial [K and en mixture was stirred at 50 °C for 1 h to dissolve K partially in en to produce a blue solution]. This mixture was continuously stirred for 30 min at 50 °C followed by the addition of 3 ml of en and the mixture was stirred overnight at room temperature. The red suspension was filtered through an Acrodisc premium 25-mm syringe filter with GxF/0.2  $\mu$ m pores (syringe filter) and the resulting dark red solution was used for further reactions. Note: As and K metals did not completely dissolve.

## Single Crystal Structure Determination

X-Ray diffraction data were collected at 120 K on a Bruker APEX diffractometer with a CCD area detector equipped with an X-stream 2000 cryo-system low-temperature device. A suitable crystal for compound **1** was carefully selected under a polarizing microscope and

mounted on a loop using N-Paratone oil and quickly placed under the nitrogen flow of the cryo-stream. The X-ray generator was operated at 50 kV and 32 mA using Mo K $\alpha$  ( $\lambda = 0.71073 \text{ \AA}$ ) radiation. Data were collected with a  $\omega$  scan width of  $0.3^\circ$ . A total of 600, 430, 235 and 50 frames were collected in four different settings of  $\phi$  ( $0^\circ$ ,  $90^\circ$ ,  $180^\circ$ ,  $270^\circ$ ) keeping the sample-to-detector distance fixed at 5.8 cm and the detector position ( $2\theta$ ) fixed at  $-25^\circ$ . Pertinent experimental details of the structure determination of compound **1** are presented in Table S1.

The data were reduced using SAINTPLUS<sup>S1</sup> and an empirical absorption correction was applied using the SADABS<sup>S2</sup> program. The structure was solved by direct methods using SHELXS97 and refinement against  $F^2$  was carried out using the SHELXTL V6.1 package of programs.<sup>S3</sup> Each of four following arsenic atoms in the  $[\text{As}_7]^{2-}$  cluster were disordered over two positions with occupancies as given below (the disorder was modeled using the PART instruction):

| Atom | Site occupancy | Atom | Site occupancy |
|------|----------------|------|----------------|
| As3A | 0.83005        | As3B | 0.16995        |
| As4A | 0.82511        | As4B | 0.17489        |
| As6A | 0.79608        | As6B | 0.20392        |
| As7A | 0.73755        | As7B | 0.26245        |

For the final refinement, the hydrogen atoms were placed in geometrically ideal positions and refined using the riding mode. The last cycles of the refinement included atomic positions, anisotropic thermal parameters for all atoms other than hydrogen, and isotropic thermal parameters for all the hydrogen atoms.

## Other Experiments

The yield of the reaction is 85% and single crystals are monophasic in nature. We have checked cell parameters for several crystals which match the crystal data of **1**. We have used powders derived from single crystals for magnetic, EPR and the solid state band-gap measurements. The crystals were washed with ethylenediamine and dried in vacuum in glove box and finely ground to the powder form prior to the measurements. Cyclic voltammetry experiment was carried out with solid  $K_3As_7$  compound.

**Powder X-ray Diffraction:** Powder XRD patterns were taken with a Rigaku (RU-200) X-ray generator equipped with a Guinier camera (G670 from Huber Difraktionstechnik GmbH and Co. KG) using monochromatized  $CuK\alpha$  ( $\lambda = 1.5418 \text{ \AA}$ ) radiation. The finely powdered single crystals were placed on Milar film (on a holder) in the argon filled glove box. The sample was covered with another film. The holder with sample was tightened with a ring. The junction of the holder and ring was covered with high vacuum grease. The XRD pattern of compound **1** is consistent with the XRD pattern simulated from the single crystal structure (Figure S3), suggesting that the powder consists of pure **1**. Data was collected on Milar film to check the background noise.

**Magnetic Measurement:** Magnetic studies were carried out using a SQUID magnetometer (Quantum Design Inc., USA) over the temperature range 1.8 to 160 K at a magnetic field of 100 Oe. The inherent sensitivity of the SQUID set up allows for very accurate (up to  $10^{-7} \text{ emu} = 10^{-7} \text{ erg/G}$ ) measurements of the sample's magnetization to be made. The powder samples (ground single crystal) of **1** were loaded in a glass capillary and sealed with high vacuum grease in the argon filled glove box. The capillary was then placed inside of a standard plastic drink straw. Measurements were made on an empty glass capillary to insure that the background from the sample mounting was negligible.

**Electron Paramagnetic Resonance:** EPR measurements were performed on Elexsys 500 machine operating at 9.3897 GHz frequency. The powder samples (ground single crystal) of **1** were loaded in the EPR tube and sealed with septum and high vacuum grease in the argon filled glove box. The spectra of **1** were recorded between 5 and 100 K using liquid He cryostat. Measurements were made on an empty EPR tube to insure that the background from the sample mounting was negligible.

**Cyclic Voltametry:** Cyclic voltametry studies were performed on a SP-150 Bio Logic potentiostat using a Pt-stripe working electrode Pt-stripe counter electrode and Ag/AgCl reference electrode (in 3 M KCl). DMF was used as solvent. 0.1 M lithium tetrafluoroborate was used as supporting electrolyte. Cyclic voltammograms were run at scan rate of 100 mV/s from -0.8 V to 0.8 V at room temperature under Ar atmosphere in a glove box.

**Solid-State Band Gap Measurements:** Diffuse reflectance spectra were collected at room temperature using a Perkin Elmer Lambda 950 UV-Vis-NIR spectrophotometer, equipped with a Harrick Praying Mantis diffuse reflectance accessory. A photomultiplier tube was used for detection in the 320-860.5 nm range, while a lead sulfide detector was used for the 860.5-2300 nm range. The spectra were collected from 320-2300 nm, with 1.0 nm resolution and integration times of 0.64 s. A dry and finely ground magnesium oxide (MgO) powder was used as a reflectance reference material. Prior to any measurements, single crystals of compound **1** were finely ground and diluted with MgO to 30% by weight.

For a crystalline solid with a band gap ( $E_{bg}$ ), the frequency dependence ( $\nu$ ) of the absorption coefficient ( $\kappa$ ) can be approximated as:

$$\kappa(\nu) = \frac{B_T (h\nu - E_{bg})^n}{h\nu},$$

where  $B_T$  is a constant derived from the square of the averaged dipolar momentum matrix element, and  $n$  is equal to 0.5 and 2 for *direct* and *indirect* band gap transitions, respectively. The formula for indirect band gap was used in this case.

**Theoretical calculations:** The electronic structures of compound, **1** were calculated by the VASP code<sup>S4</sup> based on the density-functional theory, which uses a plane-wave basis and PAW pseudopotentials<sup>S5</sup> to describe the electron-ion interaction. The Perdew-Burke-Ernzerhof (PBE) formalism<sup>S6</sup> was used for exchange and correlation potentials and energies. Brillouin zone integrations were carried out on a Monkhorst-Pack<sup>S7</sup> grid of 4x2x2 k-points, using the tetrahedral method. The kinetic energy cut-off of 300 eV is used for the plane wave basis. The atomic positions were optimized until the forces were less than 10 meV/Å. The calculations were spin unrestricted, and ferromagnetic, antiferromagnetic, and nonmagnetic ground states were considered.

The electronic orbitals and eigenstates of the free clusters were determined by using a linear combination of Gaussian orbitals molecular orbital approach within a density functional theory (DFT) formalism. For all atoms, we employed the DFT optimized DZVP basis set.<sup>S8</sup> The actual calculations were based on the deMon2K set of codes (see ref. S9 and references therein). The exchange-correlation potential was calculated using the orbital charge density. All the structures were fully optimized in redundant coordinates without symmetry constraints, and spin unrestricted calculations were performed for  $As_7^{2-}$ .<sup>S9</sup> Optical spectra were calculated using TD-DFT using the ADF code,<sup>S10</sup> and the solvent was simulated by using the COSMO method.<sup>S11</sup>

## References

- S1 *SMART (V 5.628), SAINT (V 6.45a), XPREP, SHELXTL*; Bruker AXS Inc.: Madison, WI, **2004**.
- S2 G. M. Sheldrick, *Siemens Area Correction Absorption Correction Program*; University of Göttingen: Göttingen, Germany, **1994**.
- S3 G. M. Sheldrick, *SHELXL-97 Program for Crystal Structure Solution and Refinement*; University of Göttingen: Göttingen, Germany, **1997**.
- S4 G. Kresse, J. Hafner, *J. Phys.: Condens. Matter*. **1994**, 6, 8245.
- S5 G. Kresse, D. Joubert, *Phys. Rev. B* **1999**, 59, 1758.
- S6 J. P. Perdew, K. Burke, M. Ernzerhof, *Phys. Rev. Lett.* **1996**, 77, 3865.
- S7 H. J. Monkhorst, J. D. Pack, *Phys. Rev. B* **1976**, 13, 5188.
- S8 N. Godbout, D. R. Salahub, J. Andzelm, E. Wimmer, *Can. J. Chem.* **1992**, 70, 560.
- S9 J. U. Reveles, A. M. Köster, *J. Comput. Chem.* **2004**, 25, 1109.
- S10 G. te Velde, F. M. Bickelhaupt, S. J. A. van Gisbergen, C. Fonseca Guerra, E. J. Baerends, J. G. Snijders, T. Ziegler. *J. Comput. Chem.* **2001**, 22, 931.
- S11 C. C. Pye, T. Ziegler. *Theor. Chem. Acc.* **1999**, 101, 396.

Table S1. Crystal data and structure refinement parameters for compound [K(2,2,2-crypt)]<sub>2</sub>  
 [As<sub>7</sub>].THF, **1**.

|                                                              |                                                                                               |
|--------------------------------------------------------------|-----------------------------------------------------------------------------------------------|
| Empirical formula                                            | C <sub>40</sub> H <sub>80</sub> As <sub>7</sub> K <sub>2</sub> N <sub>4</sub> O <sub>13</sub> |
| Formula weight                                               | 1427.72                                                                                       |
| Crystal system                                               | Triclinic                                                                                     |
| Space group                                                  | <i>P</i> -1 (No. 2)                                                                           |
| <i>a</i> (Å)                                                 | 10.862(3)                                                                                     |
| <i>b</i> (Å)                                                 | 12.933(4)                                                                                     |
| <i>c</i> (Å)                                                 | 21.592(6)                                                                                     |
| $\alpha$ (deg)                                               | 102.376(5)                                                                                    |
| $\beta$ (deg)                                                | 96.120(6)                                                                                     |
| $\gamma$ (deg)                                               | 100.964(5)                                                                                    |
| Volume (Å <sup>3</sup> )                                     | 2873.9(13)                                                                                    |
| <i>Z</i>                                                     | 2                                                                                             |
| Size (mm)                                                    | 0.18 x 0.12 x 0.05                                                                            |
| <i>T</i> (K)                                                 | 120(2)                                                                                        |
| $\rho_{\text{calc}}$ (g cm <sup>-3</sup> )                   | 1.650                                                                                         |
| $\mu$ (mm <sup>-1</sup> )                                    | 4.221                                                                                         |
| $\theta$ range (deg)                                         | 0.98 to 26.00                                                                                 |
| Reflections collected                                        | 23518                                                                                         |
| Unique reflections                                           | 11211                                                                                         |
| Number of parameters                                         | 635                                                                                           |
| Goodness of fit ( <i>S</i> )                                 | 0.984                                                                                         |
| Final <i>R</i> indices [ <i>I</i> > 2 $\sigma$ ( <i>I</i> )] | <i>R</i> <sub>1</sub> = 0.0534, <i>wR</i> <sub>2</sub> = 0.1163                               |
| <i>R</i> (all data)                                          | <i>R</i> <sub>1</sub> = 0.0817, <i>wR</i> <sub>2</sub> = 0.1280                               |
| Largest diff. peak and hole (e.Å <sup>-3</sup> )             | 2.230 and -1.567                                                                              |

$$R_1 = \sum ||F_o| - |F_c|| / \sum |F_o|; wR_2 = \{ \sum [w(F_o^2 - F_c^2)] / \sum [w(F_o^2)^2] \}^{1/2}.$$

$w = 1/[\rho^2(F_o)^2 + (aP)^2 + bP]$ .  $P = [\max(F_o, 0) + 2(F_c)^2]/3$ , where  $a = 0.0536$  and  $b = 0.0000$  for compound **1**.



Table S2. Selected As – As bond distances in compound [K(2,2,2-crypt)]<sub>2</sub>[As<sub>7</sub>].THF, **1**.

| <b>Bond</b>          | <b>Distance (Å)</b> |
|----------------------|---------------------|
| As1 – As2            | 2.3723(10)          |
| As1 – As5            | 2.3398(11)          |
| As3A – As2           | 2.4195(16)          |
| As3A – As4A          | 2.3466(17)          |
| As3B – As2           | 2.1673(63)          |
| As3B – As4B          | 2.3570(16)          |
| As4A – As5           | 2.4117(12)          |
| As4A – As7A          | 2.4715(35)          |
| As4B – As5           | 2.7397(56)          |
| As6A – As2           | 2.4470(34)          |
| As6A – As7A          | 2.4076(45)          |
| As6B – As2           | 2.5074(11)          |
| As6B – As3B          | 2.5081(25)          |
| As6B – As7B          | 2.3252(27)          |
| As7A – As5           | 2.4409(29)          |
| As7B – As5           | 2.5751(12)          |
| <b>Av. (As – As)</b> | <b>2.4272</b>       |

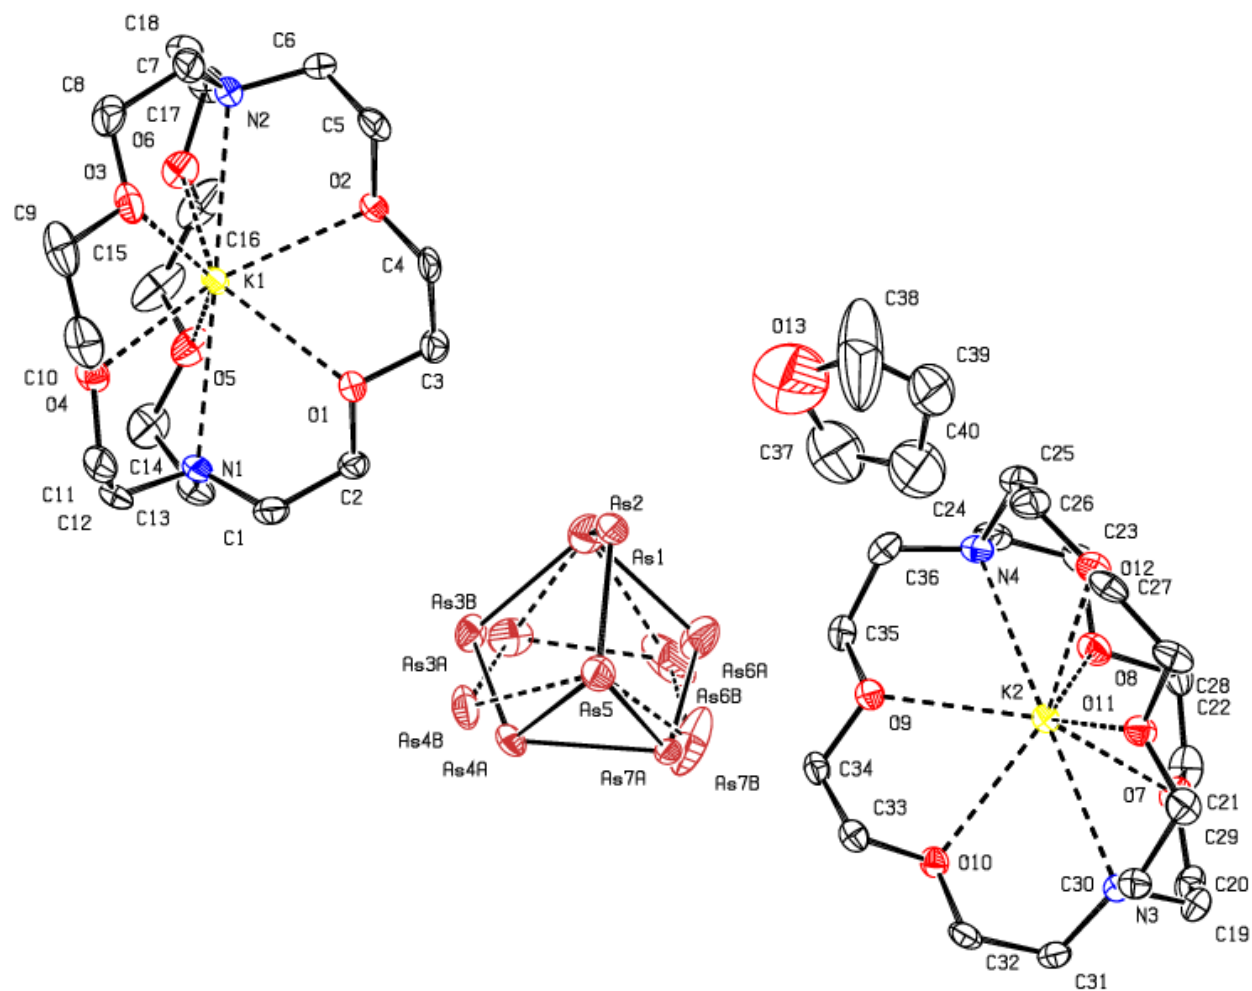

(a)

**Fig. S1a.** ORTEP diagram of the of  $[\text{K}(2,2,2\text{-crypt})]_2[\text{As}_7]\cdot\text{THF}$  **1**, with the atom numbering scheme for the asymmetric unit. Displacement ellipsoids have been drawn at 50% probability level. The hydrogen atoms have been omitted for clarity. The dotted lines in the  $[\text{K}(2,2,2\text{-crypt})]^+$  cation indicate dative bonds of the cryptand to the  $\text{K}^+$  ion, whereas those in the disordered  $[\text{As}_7]^{2-}$  cluster indicate the As–As bonds involving As3B, As4B, As6B and As7B.

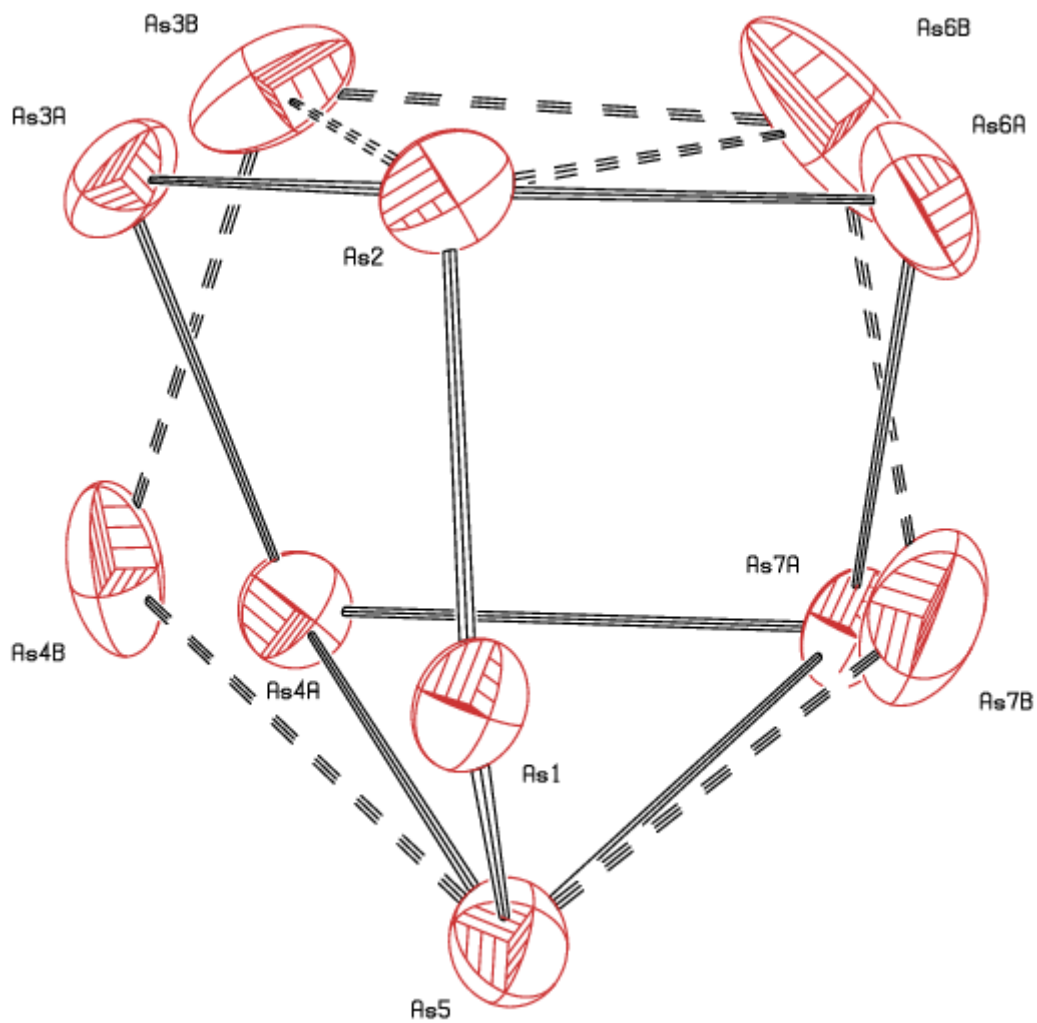

**Fig. S1b.** A detailed view of the As–As bonds in the disordered  $[\text{As}_7]^{2-}$  cluster

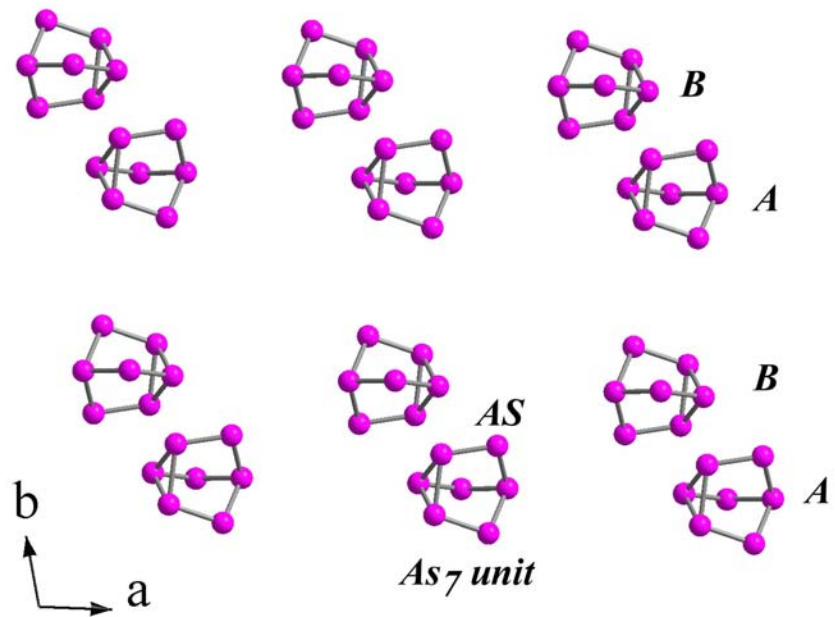

**Fig. S2.** The ABAB arrangement of the As<sub>7</sub> cluster of [K(2,2,2-crypt)]<sub>2</sub>[As<sub>7</sub>].THF, **1** in the *ab* plane.

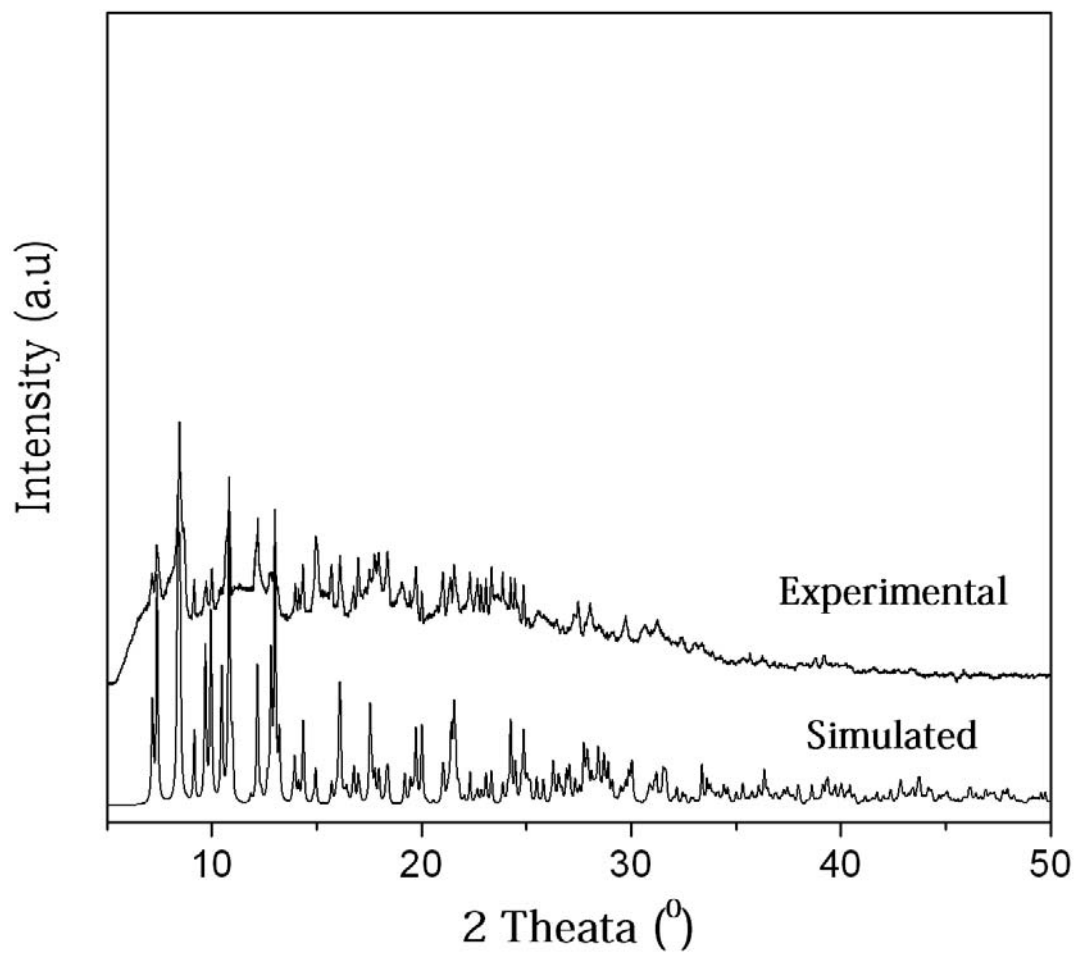

**Fig. S3.** Simulated and experimental powder pattern of compound **1**.

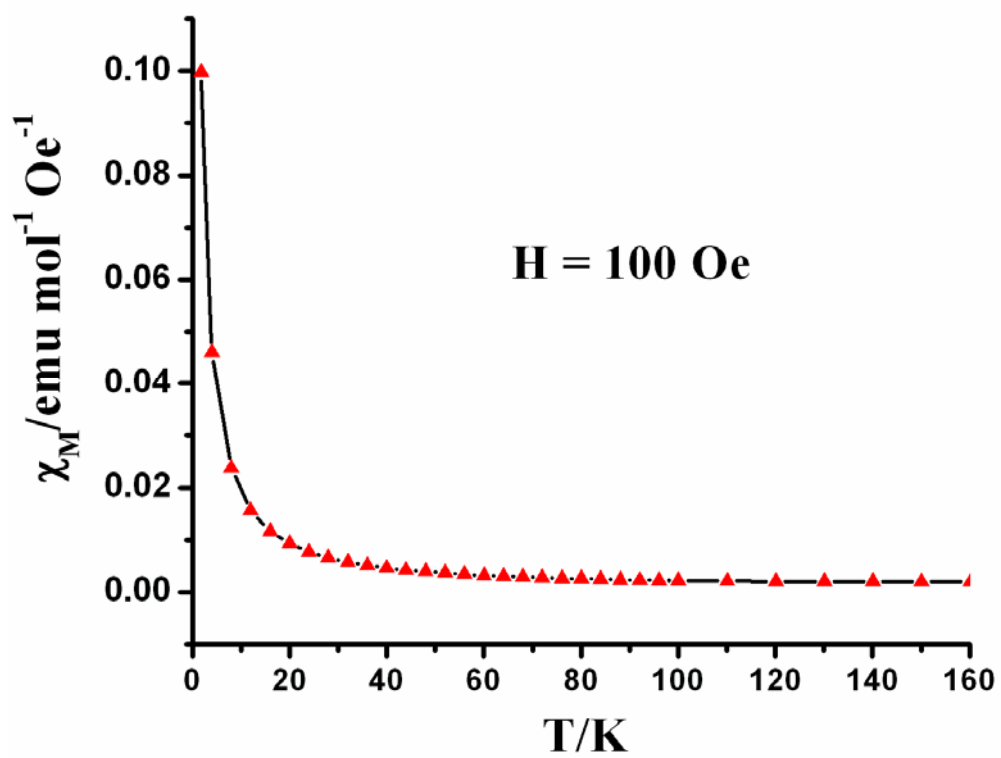

**Fig. S4.**  $\chi_M$  vs. T data of **1** at 100 Oe.

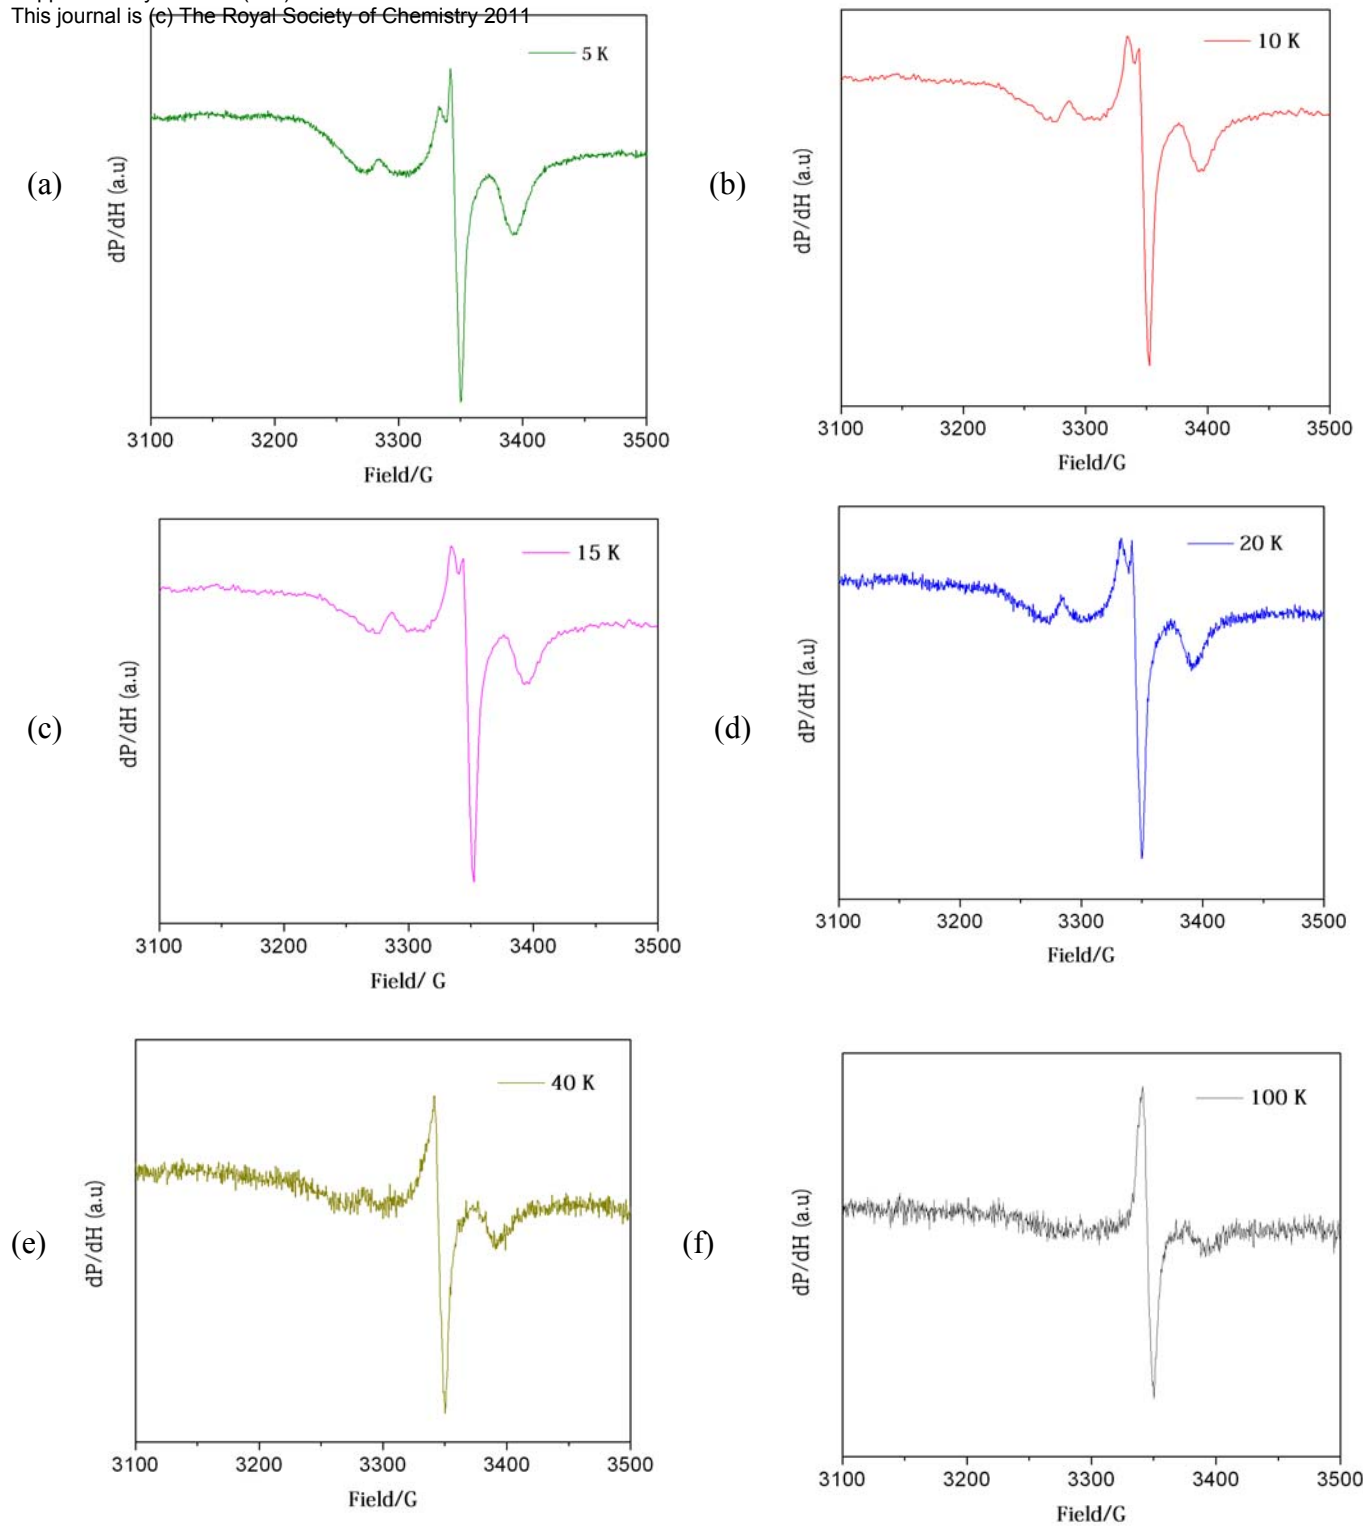

**Fig. S5.** EPR data of **1** at different temperature ranging from 5 – 100 K (a – f).

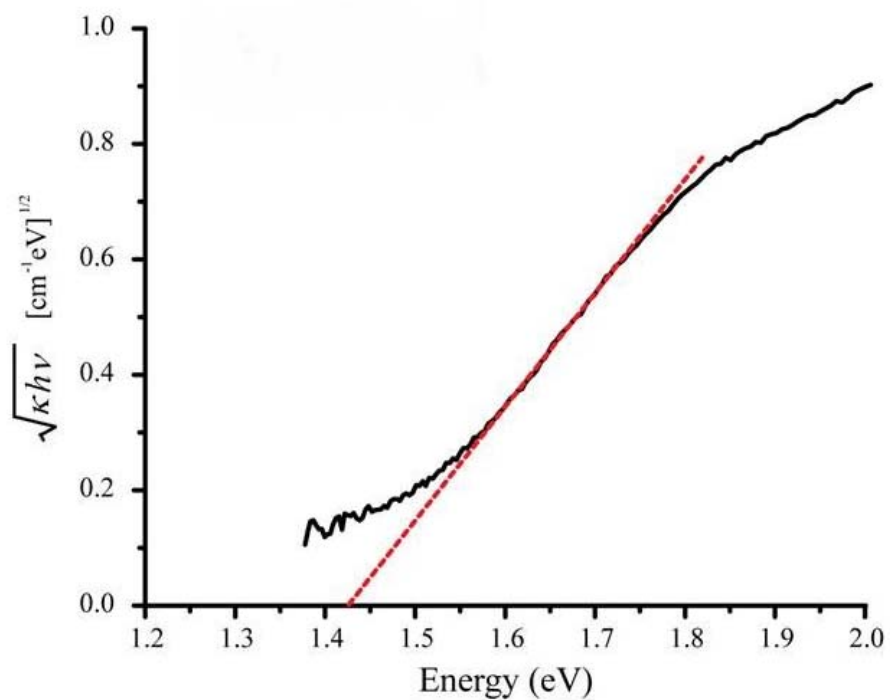

**Fig. S6.** Tauc plot showing the band gap determined from the optical absorption spectra of compound  $[\text{K}(2,2,2\text{-crypt})]_2[\text{As}_7]\cdot\text{THF}$ , **1**.



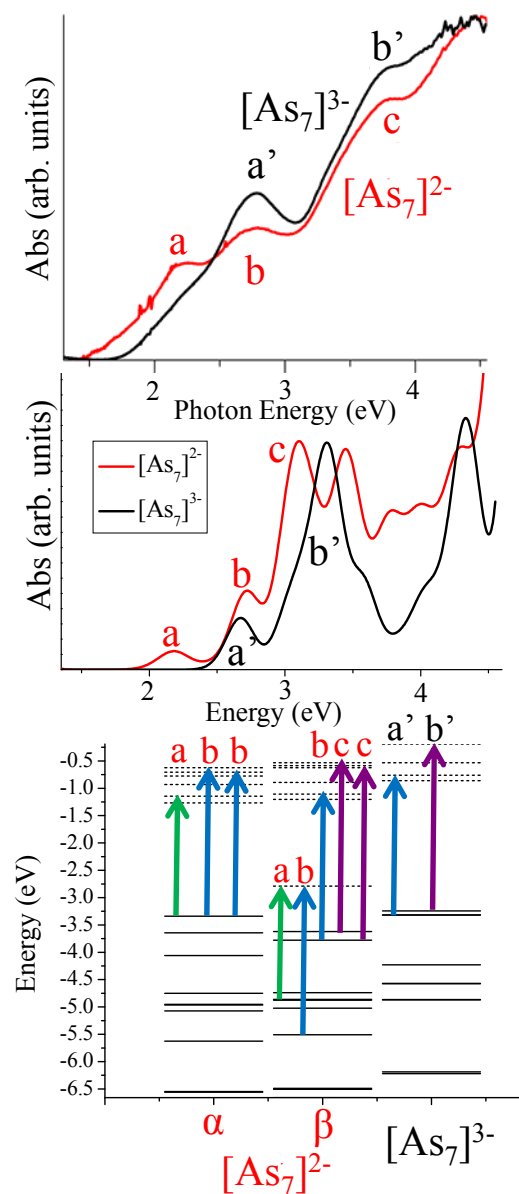

**Fig. S7.** Experimental UV-Vis spectra of  $[\text{As}_7]^{2-}$  and  $[\text{As}_7]^{3-}$ . Calculated UV-Vis spectra of  $[\text{As}_7]^{2-}$  and  $[\text{As}_7]^{3-}$ , and the primary transition which produce the spectra. Red indicates the observed peak associated with the transition, red labels are for  $[\text{As}_7]^{2-}$  black labels are for  $[\text{As}_7]^{3-}$ .

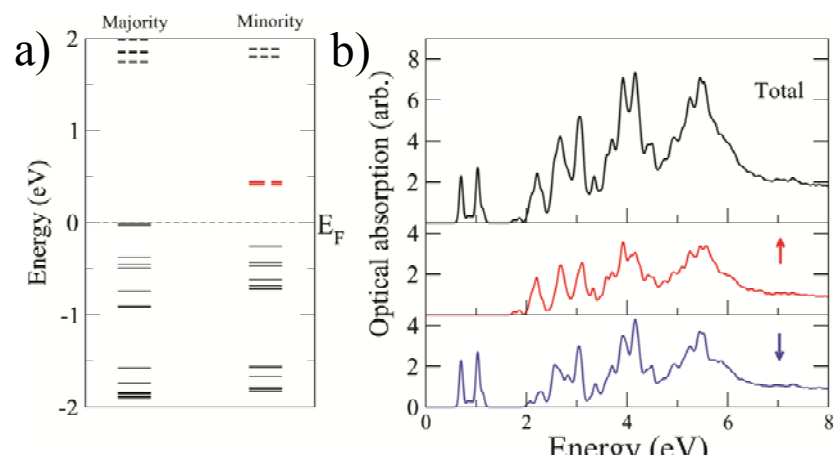

**Fig. S8.** a) Calculated one-electron levels at the Gamma point of the [K-crypt]<sub>2</sub>[As<sub>7</sub>] material and  
b) the calculated absorption spectra.

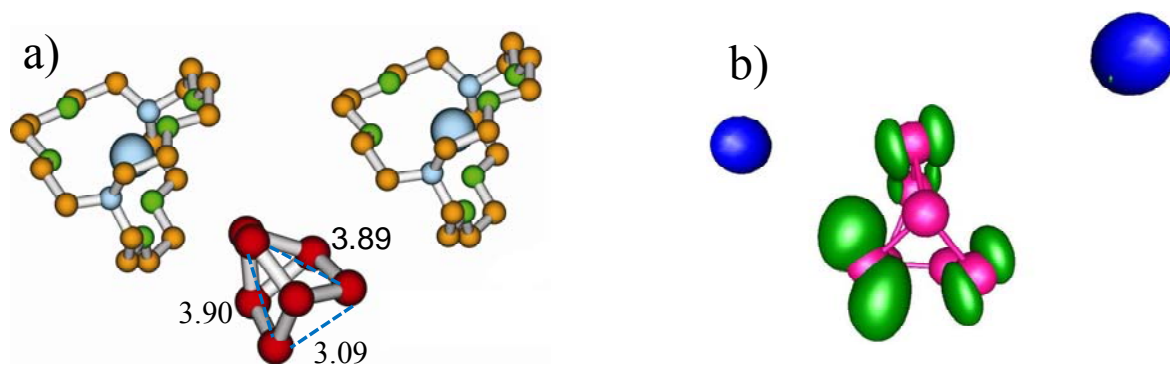

**Fig. S9.** a) Calculated geometries and b) electron spin density (in green) of the  $[\text{K-crypt}]_2[\text{As}_7]$  in a ferromagnetic (FM) solid state. Bond lengths are in angstroms ( $\text{\AA}$ ).

### XYZ Coordinates from Theoretical Calculations.

(1). Ferromagnetic arrangement (Figure S8), all coordinates in angstroms.

Total energy = -59.26833 Hartree

Unit Cell Parameters:

a = 10.890  
b = 12.948  
c = 21.563  
alpha = 102.283  
beta = 96.156  
gamma = 100.940

Space Group Number = 2  
Space Group Symbol = P-1

Cell Volume = 2882.138 Z=2

292

As 0.83496257 4.42306625 6.21063164  
As -1.46868944 3.90914163 6.30510429  
As 1.55946324 2.91364434 4.50030885  
As 9.16865548 1.47940715 5.80065517  
As 8.67909996 3.21400788 4.01229305  
As -0.15557498 2.92041868 2.74567841  
As 0.43260599 0.78478609 4.91253155  
As 5.28473402 3.17066872 14.60927806  
As 7.58800581 3.68568613 14.51417806  
As 4.56007418 4.67894397 16.32058978  
As -3.05033396 6.11531082 15.01940821  
As -2.55912810 4.38021491 16.80690482  
As 6.27594572 4.67221893 18.07447634  
As 5.68596633 6.80849590 15.90926836  
K 2.97530213 9.71238397 1.70214069  
K 3.14485482 -2.11937441 19.11697824  
K -0.85717753 0.21668158 12.43236084  
K 6.97837648 7.37669489 8.38618777  
C 0.47322613 8.45984891 0.78492605  
C 3.35374510 8.51416391 5.15906499  
C 2.46790318 7.47992555 4.51327993  
C 0.71344239 7.16698081 2.93570283  
C -0.23669969 7.91268799 2.00670343  
C -1.55178027 2.24000171 20.60570971  
C 1.84922651 2.99482170 19.33373416  
C 6.35339353 11.30690394 1.38737169  
C 6.10946267 10.49781274 3.65941773

C 5.15434553 10.01905783 4.73533072  
C 6.39794988 0.49646188 2.20887232  
C -0.75139967 10.70536819 0.77306165  
C 2.79931123 -0.34935995 2.07000058  
C 4.02506693 0.52508704 2.08700739  
C 7.53248116 -0.13242793 2.98840745  
C 6.52802735 10.00818170 0.62595681  
C 3.11901031 3.28626646 20.08933220  
C -0.45870830 2.52588439 19.58949095  
C 5.64697886 -0.86716152 20.03523841  
C 2.76932505 -0.92052149 15.66043718  
C 3.65509958 0.11337880 16.30676902  
C 5.40986912 0.42585154 17.88404827  
C 6.35855560 -0.32000194 18.81432983  
C 7.66931253 5.35227087 0.21414979  
C 4.26634255 4.59492245 1.48462541  
C -0.23549971 -3.71450340 19.42820892  
C 0.01244319 -2.90509930 17.15677616  
C 0.96907182 -2.42584398 16.08244335  
C -0.27718105 7.09745964 18.61059847  
C 6.87160297 -3.11251103 20.04820110  
C 3.32137589 7.94342435 18.74903508  
C 2.09583735 7.06867909 18.73171329  
C -1.41133765 7.72529443 17.82971782  
C -0.41117514 -2.41586238 20.18949520  
C 2.99753411 4.30632418 0.72628131  
C 6.57594020 5.06567637 1.23033215  
C 8.42078635 2.09489909 9.70040690  
C 7.31160947 1.85462628 10.69086472  
C -0.09918681 2.18638434 9.46201506  
C 2.35180736 0.41490655 10.30109382  
C -2.52580407 9.30430220 11.96306274  
C 0.34464285 2.30913184 15.13197910  
C -0.44496465 1.29004520 15.91468085  
C -2.40868281 -0.04819928 15.81613928  
C 7.27951124 -0.36706733 14.94607959  
C 6.47381459 -1.09649924 12.77619396  
C 7.92393506 -2.53239321 14.07356986  
C 1.16577895 2.51555889 10.22444874  
C 6.28097033 0.24005200 12.08466752  
C 2.52267504 1.95875578 12.16383116  
C 1.78318012 2.65200272 13.28677389  
C 2.49734020 -0.92327531 10.99910637  
C 1.29346813 -2.77141923 11.86307611  
C 6.24741802 9.44260148 13.00885690  
C -2.30090936 5.49817772 11.11899079

C -1.19159064 5.73831763 10.12860903  
C 6.21870312 5.40873648 11.35691261  
C 3.76703280 7.17801976 10.51606472  
C 8.64501620 -1.71086891 8.85624085  
C 5.77603698 5.28723751 5.68304014  
C 6.56615950 6.30728398 4.90200268  
C 8.53156377 7.64280368 5.00242013  
C -1.15739946 7.96104288 5.87377899  
C -0.35278465 8.68977778 8.04419807  
C -1.80383167 10.12543284 6.74731601  
C 4.95449287 5.07834692 10.59370215  
C -0.15998964 7.35308774 8.73557040  
C 3.59929737 5.63452385 8.65275398  
C 4.34029411 4.94179075 7.53040567  
C 3.62187900 8.51646437 9.81854684  
C 4.82572162 10.36492254 8.95575894  
C -0.12741569 -1.85028284 7.81242421  
C 1.67754984 8.14474093 13.68714804  
C 1.87823549 7.44285829 15.04810184  
C 1.24770270 6.04745401 14.84764227  
C 0.65511881 7.24609669 12.99138415  
C 4.44490363 -0.54956389 7.12904918  
C 4.24309890 0.15275320 5.76836137  
C 4.87446335 1.54808667 5.96756493  
C 5.46581576 0.35027626 7.82548873  
N -0.41052466 9.43401497 0.06470692  
N 5.44703632 11.21627480 2.55045420  
N 6.53010527 -1.84120609 20.75635857  
N 0.67314903 -3.62341417 18.26686694  
N 7.60069460 -1.13490327 13.72500234  
N 1.64042138 1.42356837 11.10438578  
N -1.47949762 8.72804848 7.09517516  
N 4.47999962 6.17003564 9.71331660  
O 1.58372163 8.12752371 3.58362476  
O 4.26784247 9.03434749 4.17413447  
O 0.43496877 11.45714745 0.93851543  
O 5.18568402 -0.26603025 2.39960262  
O 0.78951660 2.75548722 20.26964546  
O 5.28356264 9.63692954 0.00831349  
O 4.53955706 -0.53451427 17.23597749  
O 1.85453525 -1.44069262 16.64470338  
O 5.68521304 -3.86380697 19.88103614  
O 0.93516368 7.85973014 18.41922322  
O 5.32841228 4.83122547 0.55037127  
O 0.83235834 -2.04553031 20.80919786  
O -0.90919914 -2.61879629 12.81649176

O 1.19818092 -1.51601178 11.16691188  
O -1.44052658 0.69697362 15.06160278  
O 1.02969437 1.67249737 14.03648973  
O 7.38743105 0.50506345 11.20166479  
O -1.20353028 2.08556796 10.38976011  
O 7.02863664 10.21179652 8.00343759  
O 4.92102069 9.10952254 9.65189509  
O 7.56241487 6.89794518 5.75594746  
O 5.09348914 5.92194990 6.78114838  
O -1.26660033 7.08817325 9.61837761  
O 7.32345918 5.50838014 10.42959840  
O 0.98352645 5.91253847 13.42288720  
O 5.13734902 1.68356656 7.39293071  
H 2.73533804 9.34501660 5.57369758  
H 3.91874204 8.03321146 5.98960461  
H 3.09318589 6.72070580 3.98537830  
H 1.88853337 6.92687867 5.28911815  
H 0.16762490 6.58018837 3.70651790  
H 1.33522053 6.43211566 2.37599212  
H -1.08275785 7.20336668 1.76441893  
H -0.69497455 8.72211460 2.61403130  
H -2.46770119 1.93901195 20.01423326  
H 1.04488270 6.44681216 0.34550331  
H 1.58660716 3.84348707 18.66095134  
H 2.01602903 2.09638664 18.69285909  
H 7.36254730 11.68424066 1.69560681  
H 5.93853954 12.06105658 0.69162546  
H 6.90106248 11.13020829 4.13749782  
H 6.61259215 9.60583455 3.23936123  
H 5.74261236 9.57707827 5.57226340  
H 4.56052625 10.85894613 5.16447780  
H 6.26258626 1.52960677 2.60401581  
H 6.61893589 0.57953419 1.12033673  
H -1.48882340 11.24193059 0.13421506  
H -1.21097681 10.44898030 1.74834857  
H 0.25537604 11.77323266 3.00917067  
H 1.89589083 0.29728361 1.99443336  
H 4.14749741 1.03103440 1.10517100  
H 3.87444974 1.31806029 2.85652947  
H 8.40953508 0.55897890 2.95204317  
H 7.22971211 -0.17044303 4.05012263  
H 4.98806514 5.02973420 20.65085186  
H 6.87870182 9.17679736 1.28339484  
H 3.33498659 2.45199750 20.79391911  
H 3.96366621 3.37298995 19.36696022  
H -0.34333914 1.65933733 18.89494970

H -0.70337348 3.40824317 18.94635682  
H -3.65688736 3.92489070 20.49337548  
H -2.25053378 4.59072823 19.99431803  
H 3.38773817 -1.75146238 15.24598235  
H 2.20488949 -0.43928616 14.82968505  
H 3.02983779 0.87231360 16.83510989  
H 4.23430525 0.66678437 15.53109579  
H 5.95675780 1.01181438 17.11338660  
H 4.78818701 1.16153042 18.44277090  
H 7.20465053 0.38898196 19.05747292  
H 6.81736971 -1.12964638 18.20767115  
H 8.58433359 5.65464982 0.80646650  
H 5.07233476 1.14498080 20.47371718  
H 4.52181191 3.74476854 2.15887183  
H 4.10078071 5.49421244 2.12452992  
H -1.24398516 -4.09178924 19.11775482  
H 0.17813285 -4.46880031 20.12455878  
H -0.77805179 -3.53776540 16.67725308  
H -0.49184764 -2.01342588 17.57607319  
H 0.38171503 -1.98404631 15.24475324  
H 1.56376875 -3.26550232 15.65407154  
H -0.14154449 6.06373280 18.21709781  
H -0.49869321 7.01602006 19.69915461  
H 7.60798132 -3.64943292 20.68794430  
H 7.33262737 -2.85611420 19.07359600  
H 5.86516205 -4.17859642 17.81020892  
H 4.22503670 7.29707667 18.82432050  
H 1.97344987 6.56269581 19.71353071  
H 2.24650239 6.27574375 17.96219368  
H -2.28808761 7.03351807 17.86577263  
H -1.10770840 7.76281490 16.76822340  
H 1.12752816 2.56296567 0.16340325  
H -0.76017212 -1.58426062 19.53148099  
H 2.78469120 5.14023086 0.02039586  
H 2.15142220 4.22174847 1.44721414  
H 6.45835219 5.93383267 1.92248105  
H 6.82276053 4.18564319 1.87573131  
H 9.77619420 3.66781308 0.32865281  
H 8.36927730 3.00201616 0.82629350  
H 8.41219614 1.32505233 8.89753001  
H 8.25394409 3.07682602 9.20458177  
H 7.37361083 2.57101441 11.54126887  
H 6.33802531 2.01649399 10.17463647  
H -0.28262625 2.99018267 8.71604281  
H -0.00997577 1.24256053 8.87701063  
H 3.36892390 0.77359554 9.99629599



H 1.78814960 0.25611917 9.36188210  
H -2.98034268 9.20143211 10.95157001  
H -2.40870598 8.28306971 12.39018763  
H -0.33811569 3.09862150 14.74538252  
H 1.08124600 2.79345845 15.81555251  
H 0.21619531 0.50174693 16.34325338  
H -0.94653528 1.83040096 16.74862485  
H 8.12956911 0.56544392 16.67509817  
H -1.93417486 -0.96483548 16.23703973  
H 6.52804557 -0.90503068 15.57848700  
H 6.81740388 0.59709815 14.65664892  
H 5.50579651 -1.36592266 13.27827824  
H 6.65268852 -1.86899053 12.00273826  
H 7.00847171 -3.13039333 14.31406300  
H 8.53274357 -2.53225164 14.99609996  
H 1.94753026 2.81112666 9.48104138  
H 0.96532536 3.40265191 10.85456759  
H 5.33474861 0.20374553 11.49318446  
H 6.16660649 1.07406157 12.81411015  
H 3.28198443 2.66881032 11.75207925  
H 3.09661450 1.12347436 12.60843278  
H 2.53835859 3.13607758 13.94713253  
H 1.10244778 3.45269218 12.92465636  
H 3.14212750 -1.59212834 10.37914893  
H 2.99144097 -0.82489053 11.99348096  
H 1.71881924 -2.60701120 12.87942245  
H -0.49112186 9.24749159 11.31182317  
H 6.40672977 8.39783861 13.36680872  
H 5.71260120 9.39487139 12.03378398  
H -2.29195563 6.26766074 11.92222222  
H -2.13454286 4.51593674 11.61433869  
H -1.25404066 5.02248103 9.27777267  
H -0.21812726 5.57565167 10.64480636  
H 6.40180610 4.60610731 12.10422388  
H 6.12883635 6.35353185 11.94022865  
H 2.74965064 6.81873711 10.81927780  
H 4.32929393 7.33656595 11.45615244  
H 9.09901715 -1.60779258 9.86794611  
H 8.52825221 -0.68974761 8.42876475  
H 6.45819861 4.49572942 6.06648934  
H 5.03761775 4.80594410 4.99928697  
H 5.90552449 7.09692125 4.47510069  
H 7.06696572 5.76818546 4.06681319  
H -2.00605675 7.02918254 4.14370005  
H 8.05790402 8.55972813 4.58112994  
H -0.40536671 8.49945503 5.24239577

H -0.69552843 6.99668985 6.16294920  
H 0.61524743 8.95949039 7.54231574  
H -0.53198205 9.46210940 8.81772453  
H -0.88886572 10.72412849 6.50661236  
H -2.41307770 10.12527896 5.82507390  
H 4.17223659 4.78223279 11.33635954  
H 5.15630013 4.19138680 9.96383069  
H 0.78619332 7.38917416 9.32709820  
H -0.04575206 6.51920562 8.00597184  
H 2.83977995 4.92407488 9.06343793  
H 3.02550923 6.46963561 8.20760912  
H 3.58604334 4.45717745 6.86943057  
H 5.02137371 4.14162319 7.89298319  
H 2.97649643 9.18494040 10.43831652  
H 3.12848805 8.41841120 8.82377652  
H 4.40072783 10.20044629 7.93926992  
H 6.60997537 -1.65406077 9.50675071  
H -0.28586405 -0.80506493 7.45543321  
H 0.40682550 -1.80384660 8.78785447  
H 1.32845213 9.18930270 13.78699785  
H 2.62424707 8.15848796 13.11465693  
H 2.95386997 7.36211835 15.29706008  
H 1.37986587 7.98605453 15.87115238  
H 0.28693700 5.94711441 15.40277646  
H 1.92458550 5.22296103 15.13738888  
H -0.38494080 7.49820651 13.31157040  
H 0.70244944 7.26262909 11.88657432  
H 4.79602740 -1.59342090 7.02859449  
H 3.49820463 -0.56577191 7.70151341  
H 3.16707975 0.23396674 5.52116929  
H 4.73992830 -0.39053429 4.94449120  
H 5.83573344 1.64762616 5.41346227  
H 4.19777446 2.37255426 5.67741664  
H 6.50643792 0.09859596 7.50681119  
H 5.41712358 0.33403968 8.93028541

(2). Free Cluster:  $K_2As_7$

|    |          |         |          |
|----|----------|---------|----------|
| As | 0.00000  | 0.00000 | 0.00000  |
| As | 0.00000  | 0.00000 | 2.43088  |
| K  | 3.26472  | 0.00000 | 0.61260  |
| As | 0.54819  | 2.33724 | -0.41541 |
| K  | -2.91865 | 1.44082 | 0.64311  |
| As | 2.14591  | 3.12224 | 1.32797  |
| As | -0.53732 | 3.75149 | 1.32789  |
| As | -0.83258 | 2.22281 | 3.24982  |
| As | 1.73560  | 1.61695 | 3.24715  |
